# Supplementary material
Source: Springer Nature journal article supplement (https://www.springermedizin.de/resource/supplementary/12967_2012_1508_MOESM8_ESM.pdf/9574232)

**A**B16F10  
challenge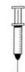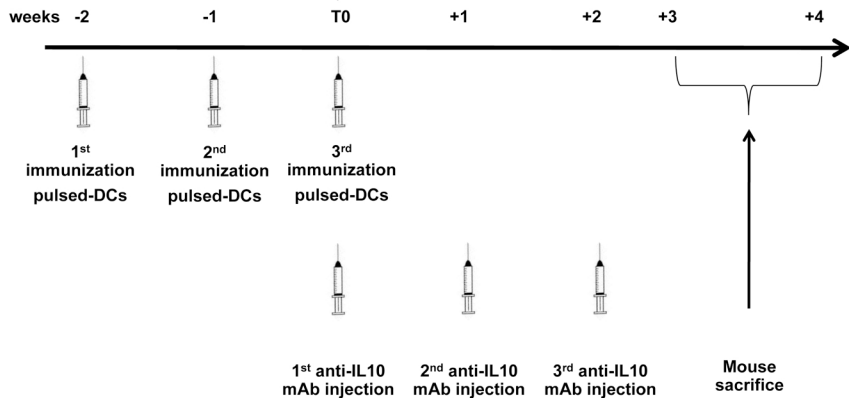**B**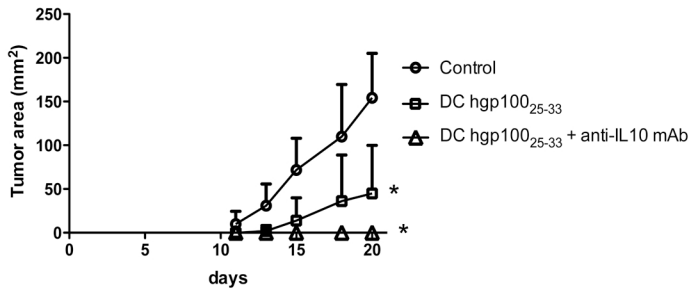

Supplement: MOESM8 [file 9574232]
